# Supplementary material for: Phenotypic Variability in Resistance to Anthracnose, White, Brown, and Blight Leaf Spot in Cassava Germplasm
Source: MDPI journal article supplement (doi:10.3390/plants13091187), 2024-04-25
Supplement: s1 [file s1]

**Table S1.** Variance components for all cassava agronomic attributes.

|       | $\sigma_{C \times L \times Y}^2$ | $\sigma_{C \times Y}^2$ | $\sigma_{C \times L}^2$ | $\sigma_C^2$ | $\sigma_{L \times Y}^2$ | $\sigma_Y^2$ | $\sigma_L^2$ | $\sigma^2$ |
|-------|----------------------------------|-------------------------|-------------------------|--------------|-------------------------|--------------|--------------|------------|
| LR    | 0.061                            | 0                       | 0                       | 0.005        | 0                       | 0.408        | 0.024        | 0.548      |
| DRY   | 2.261                            | 1.062                   | 0.089                   | 1.106        | 2.869                   | 2.13         | 0.356        | 7.676      |
| DMC   | 1.554                            | 1.036                   | 0                       | 1.268        | 0.161                   | 2.789        | 0            | 5.767      |
| FRY   | 21.597                           | 11.374                  | 8.921                   | 27.964       | 22.238                  | 23.961       | 15.247       | 55.34      |
| FSY   | 16.412                           | 12.51                   | 8.177                   | 23.644       | 29.667                  | 32.482       | 0            | 51.75      |
| Vigor | -                                | 0.204                   | -                       | 0.271        | -                       | 0.002        | -            | 0.399      |
| NRP   | -                                | 3.959                   | -                       | 1.837        | -                       | 23.108       | -            | 6.498      |

leaf retention (LR), dry root yield (DRY), dry matter content (DMC), fresh root yield (FRY), fresh shoot yield (FSY), plant vigor (Vigor), number of roots per plant (NRP).

$\sigma_{C \times L \times Y}^2$  variance component of clone, location, and year interaction;  $\sigma_{C \times Y}^2$  variance component of clone and year interaction;  $\sigma_{C \times L}^2$  variance component of clone, and location interaction;  $\sigma_C^2$  variance component of clone;  $\sigma_{L \times Y}^2$  variance component of location and year interaction;  $\sigma_Y^2$  variance component of year;  $\sigma_L^2$  variance component of location;  $\sigma^2$  variance component of residual.

**Table S2.** Deviance analysis for all cassava agronomic attributes.

|       | $\sigma_{C \times L \times Y}^2$ | $\sigma_{C \times Y}^2$ | $\sigma_{C \times L}^2$ | $\sigma_C^2$  | $\sigma_{L \times Y}^2$ | $\sigma_Y^2$  | $\sigma_L^2$ |
|-------|----------------------------------|-------------------------|-------------------------|---------------|-------------------------|---------------|--------------|
| LR    | <b>43.1</b>                      | 0                       | 0                       | 1.06          | 0                       | 2.5           | 0.18         |
| DRY   | <b>112.5</b>                     | <b>11.92</b>            | 0.64                    | <b>70.07</b>  | <b>17.67</b>            | 0.6           | 0            |
| DMC   | <b>138.67</b>                    | <b>22.47</b>            | 0                       | <b>145.52</b> | 1.99                    | 2.58          | 0            |
| FRY   | <b>127.63</b>                    | <b>15.37</b>            | <b>60.33</b>            | <b>208.26</b> | <b>22.73</b>            | 0.94          | 0.13         |
| FSY   | <b>88.87</b>                     | <b>20.26</b>            | <b>60.22</b>            | <b>168.42</b> | <b>42.96</b>            | 2.05          | 0            |
| Vigor | -                                | <b>269.61</b>           | -                       | <b>278.04</b> | -                       | 0.01          | -            |
| NRP   | -                                | <b>187.47</b>           | -                       | <b>160.84</b> | -                       | <b>271.67</b> | -            |

leaf retention (LR), dry root yield (DRY), dry matter content (DMC), fresh root yield (FRY), fresh shoot yield (FSY), plant vigor (Vigor), number of roots per plant (NRP).

$\sigma_{C \times L \times Y}^2$  variance component of clone, location, and year interaction;  $\sigma_{C \times Y}^2$  variance component of clone and year interaction;  $\sigma_{C \times L}^2$  variance component of clone, and location interaction;  $\sigma_C^2$  variance component of clone;  $\sigma_{L \times Y}^2$  variance component of location and year interaction;  $\sigma_Y^2$  variance component of year;  $\sigma_L^2$  variance component of location;  $\sigma^2$  variance component of residual.

**Significant effects are in bold.**
